# Supplementary material
Source: Springer Nature journal article supplement (https://www.springermedizin.de/resource/supplementary/12879_2006_361_MOESM4_ESM.pdf/9448856)

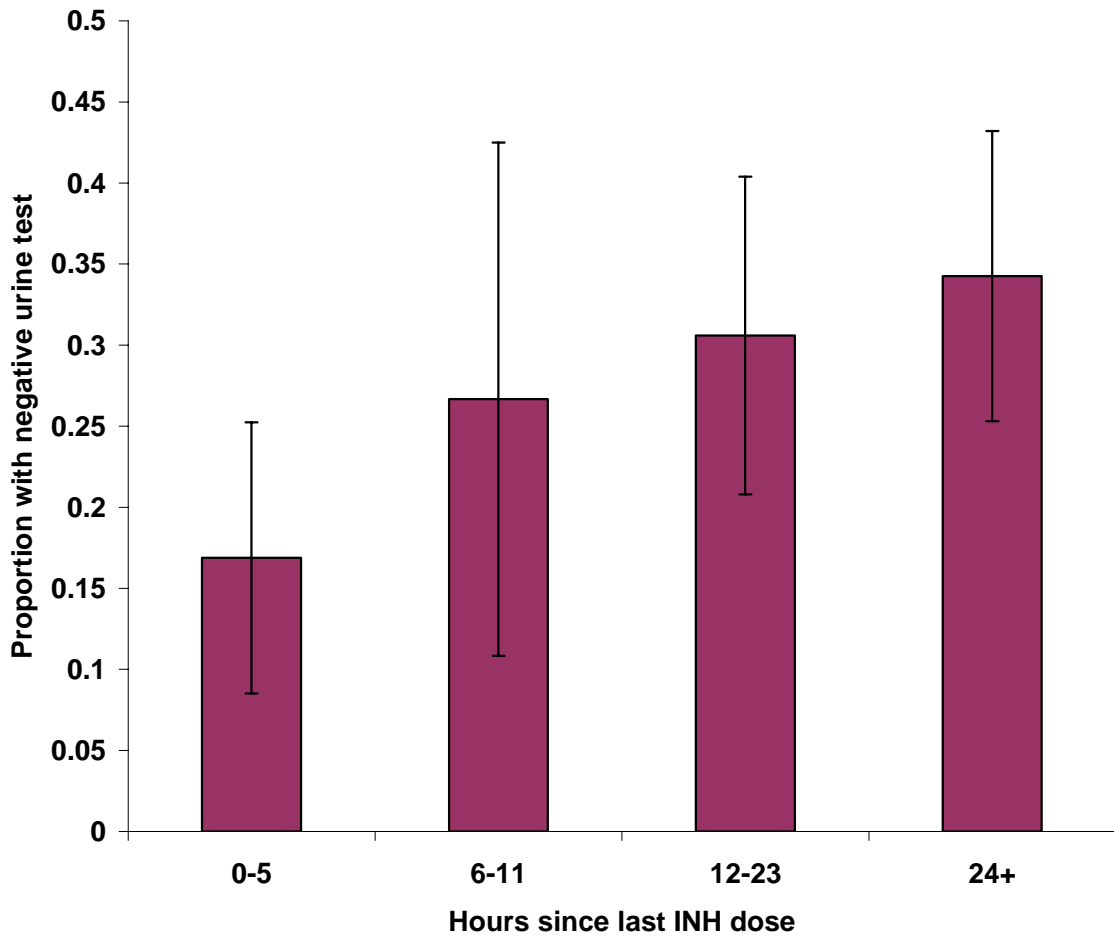

Supplement: MOESM4 [file 9448856]
